# Supplementary material
Source: Springer Nature journal article supplement (https://www.springermedizin.de/resource/supplementary/12985_2009_794_MOESM5_ESM.pdf/9609204)
Supplement: MOESM5 [file 9609204]

**A**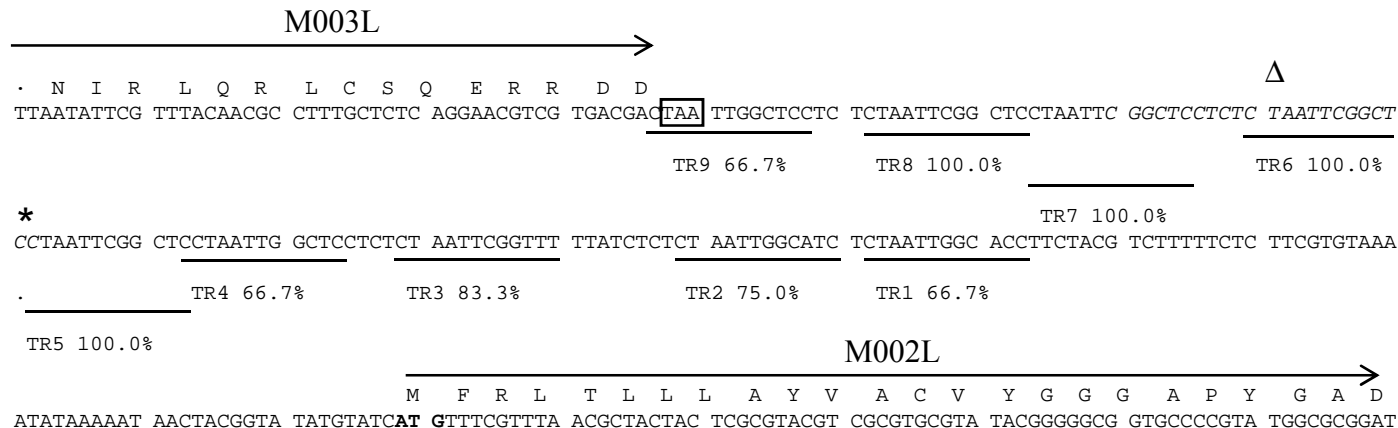**B**

| Strain | TR7         | TR6                     | *     | TR10                         | TR11          | * | TR5                     |
|--------|-------------|-------------------------|-------|------------------------------|---------------|---|-------------------------|
| Lu     | GGCTCCTAATT | CGGCTCCTCTCTAATTCGGCTCC |       | TAATTCGGCTCCTCTCTAATTCGGCTCC | TAAATTCGGCTCC |   | TAATTCGGCTCCTAATTGGCTCC |
| 87     | GGCTCCTAATT | CGGCTCCTCTCTAATTCGGCTCC |       | TAATTCGGCTCCTCTCTAATTCGGCTCC | TAAATTCGGCTCC |   | TAATTCGGCTCCTAATTGGCTCC |
| 466    | GGCTCCTAATT | CGGCTCC                 | ----- | -----                        | -----         |   | TAATTCGGCTCCTAATTGGCTCC |
| 2012   | GGCTCCTAATT | CGGCTCC                 | ----- | -----                        | -----         |   | TAATTCGGCTCCTAATTGGCTCC |
| 86     | GGCTCCTAATT | CGGCTCCTCTCTAATTCGGCTCC | ----- | -----                        | -----         |   | TAATTCGGCTCCTAATTGGCTCC |
| 2788   | GGCTCCTAATT | CGGCTCC                 | ----- | -----                        | -----         |   | TAATTCGGCTCCTAATTGGCTCC |
| 7514   | GGCTCCTAATT | CGGCTCCTCTCTAATTCGGCTCC | ----- | -----                        | -----         |   | TAATTCGGCTCCTAATTGGCTCC |
| 1312   | GGCTCCTAATT | CGGCTCCTCTCTAATTCGGCTCC | ----- | -----                        | -----         |   | TAATTCGGCTCCTAATTGGCTCC |
| 7411   | GGCTCCTAATT | -----                   | ----- | -----                        | -----         |   | CGGCTCCTAATTGGCTCC      |
| 4604   | GGCTCCTAATT | CGGCTCCTCTCTAATTCGGCTCC | ----- | -----                        | -----         |   | TAATTCGGCTCCTAATTGGCTCC |
| 6918   | GGCTCCTAATT | CGGCTCCTCTCTAATTCGGCTCC | ----- | -----                        | -----         |   | TAATTCGGCTCCTAATTGGCTCC |
